RESEARCH ARTICLE

# Association of lymphocyte count and serum albumin concentration with telomere length in Chinese sanitation workers

Xingxu Song<sup>1‡</sup>, Dafeng Lin<sup>2‡\*</sup>, Dianpeng Wang<sup>3‡</sup>, Shaofan Weng<sup>2</sup>, Shuyi Qiu<sup>4</sup>, Wei Zhou<sup>2</sup>, Aipin Xiao<sup>5</sup>, Naixing Zhang<sup>2\*</sup>

**1** Public Health Department, Jilin University, Changchun, China, **2** Occupational Health Department, Shenzhen Prevention and Treatment Center for Occupational Diseases, Shenzhen, China, **3** Medical Laboratory, Shenzhen Prevention and Treatment Center for Occupational Diseases, Shenzhen, China, **4** Public Health and Preventive Medicine Department, Shantou University, Shantou, China, **5** Public Health Department, Southern Medical University, Guangzhou, China

‡ XS, DL and DW are contributed equally to this work and shared first authorship.

\* [zhanghealth@126.com](mailto:zhanghealth@126.com) (NZ); [david1385@foxmail.com](mailto:david1385@foxmail.com) (DL)

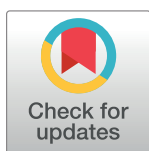

## Abstract

### OPEN ACCESS

**Citation:** Song X, Lin D, Wang D, Weng S, Qiu S, Zhou W, et al. (2024) Association of lymphocyte count and serum albumin concentration with telomere length in Chinese sanitation workers. PLoS ONE 19(10): e0311736. <https://doi.org/10.1371/journal.pone.0311736>

**Editor:** Xiaosheng Tan, Rutgers: Rutgers The State University of New Jersey, UNITED STATES OF AMERICA

**Received:** June 10, 2024

**Accepted:** September 24, 2024

**Published:** October 10, 2024

**Copyright:** © 2024 Song et al. This is an open access article distributed under the terms of the [Creative Commons Attribution License](https://creativecommons.org/licenses/by/4.0/), which permits unrestricted use, distribution, and reproduction in any medium, provided the original author and source are credited.

**Data Availability Statement:** All relevant data are within the manuscript and its [Supporting Information](#) files.

**Funding:** This work was supported by the Science and Technology Planning Project of Shenzhen Municipality [grant number KCXFZ20201221173602007], and the National Key R&D Program of China [grant number 2023YFC2509300].

## Objective

This study aimed to examine the association between inflammation-related indicators (IRIs) and telomere length (TL) in Chinese sanitation workers.

## Methods

This study adopted a case-control design, conducted from January to December 2022 in Shenzhen, a city in eastern China. A total of 80 sanitation workers, as well as 80 matched controls, were randomly recruited from the Luohu district of Shenzhen city in China. Their blood samples were collected and analyzed for the IRIs and TL in the Medical Laboratory of Shenzhen Prevention and Treatment Center for Occupational Diseases. The relationship between IRIs and TL was analyzed using multivariate linear regression, and their dose-response relationship was explored using restricted cubic spline analysis.

## Results

The systemic inflammatory index (SII), platelet-to-lymphocyte ratio (PLR), and neutrophil-to-lymphocyte ratio (NLR) were significantly elevated in the sanitation workers in comparison to the controls. Moreover, the lymphocyte count (LYM), serum albumin concentration (ALB), and TL were found to be lower in the sanitation workers compared to the controls ( $P < 0.05$ ). After adjusting for potential confounding variables, LYM was negatively correlated with TL in the sanitation workers ( $\beta = -0.31$ , 95% CI:  $-0.57, -0.05$ ), whereas no correlation was observed in the controls. Furthermore, ALB demonstrated a non-linear relationship with TL in sanitation workers.

**Competing interests:** The authors declare that they have no competing interests.

## Conclusion

We found higher novel inflammatory markers (SII, PLR, and NLR) in the sanitation workers, and identified a correlation between LYM and ALB with shortened TL in them, providing new evidence for the effect of elevated inflammation on accelerated aging in Chinese sanitation workers.

## Introduction

Sanitation workers play a pivotal role in the provision and maintenance of sanitation systems, which are essential for maintaining safe sanitation services and protecting public health in urban environments [1]. The work of sanitation workers is frequently conducted in an environment that is potentially harmful to health. This environment is characterized by exposure to dust, fumes, odors, hazardous substances and chemicals, and dangerous machinery [2]. In numerous developing countries, sanitation workers are more susceptible to ad hoc or unenforced environmental and labor protections, as well as a deficiency of occupational health and safety measures [3]. Several studies have demonstrated that sanitation workers are at an increased risk of developing respiratory infections or other adverse health conditions [4–6]. The awkward postures and heavy lifting that are common among sanitation workers increase the likelihood of developing musculoskeletal disorders [7–9]. Furthermore, the exposure of sanitation workers to environmentally hazardous substances and the performance of sewage treatment work may be associated with increased systemic inflammation and inflammatory markers [10–12]. A recent review has confirmed the elevated risk of poorer health among sanitation workers [13]. Consequently, it is imperative to comprehend the health status of sanitation workers and the health risks they confront, to inform the formulation of policies designed to safeguard their well-being, particularly in developing countries.

Telomere length (TL) considered as a biomarker of biological aging [14, 15]. Shortened TL is linked to a shorter lifespan and an increased risk of age-related diseases, including cancer, cardiovascular disease, type 2 diabetes, and all causes of mortality [16–19]. In addition to age, inflammation is another key factor contributing to TL shortening [20]. The systemic inflammatory index (SII), platelet-to-lymphocyte ratio (PLR) and neutrophil-to-lymphocyte ratio (NLR) are recently proposed inflammatory factors based on the complete blood count, which can be reliable indicators of the immune and inflammatory status of the body [21]. Additionally, low lymphocyte count (LLC) is a common laboratory finding that is indicative of an acute inflammatory response [22]. One study reported that LLC was significantly associated with frailty [23]. Aging is associated with an increase in lymphocyte apoptosis [24], and LLC has become a prognostic indicator in patients with chronic or acute heart failure [25]. Conversely, serum albumin concentration (ALB) has been associated with nutrition and inflammation [26]. A reduction in ALB is strongly correlated with the aging process, reflecting a multitude of pathological conditions, including inflammation, frailty, and a variety of other pathological conditions, such as cancer, rheumatoid arthritis, and abnormal liver function [26, 27]. Furthermore, low ALB may be associated with an increased risk of developing sarcopenia [28].

This study sought to examine the relationship between IRIs and TL in sanitation workers to help inform the development of strategies for the management and protection of sanitation workers' health especially in developing countries such as China. A random sample of 80 sanitation workers and 80 comparable controls were recruited from the Luohu District of

Shenzhen City, an eastern city in China, between January and December 2022 for this study. The survey comprised a physical examination and the completion of health-related questionnaires.

## Methods

### Study design and participants

This study adopted a case-control design, conducted from January to December 2022 in Shenzhen, a city in eastern China. A random sample of 80 sanitation workers was recruited from the Luohu District of Shenzhen for the study. They were all male, Han Chinese, and had a mean age of 52.50 ( $\pm$  5.38) years. It is worth noting that we recruited sanitation workers whose primary job was street sweeping, and we limited the enrolment of study participants who were currently smoking, to better control for confounding factors. The controls consisted of 80 non-sanitation workers recruited during the same period and place. All the controls were male, Han Chinese, with a mean age of 51.91 ( $\pm$  4.29) years, excluding current smokers. The age distributions of the two groups were not found to be significantly different, with a p-value greater than 0.05 (Table 1). All participants underwent a comprehensive physical examination and completed a series of health-related questionnaires. The physical examination entailed a comprehensive assessment, including laboratory tests, conducted at the Physical Examination

**Table 1. Baseline characteristics of the sanitation worker and control groups.**

| Variable                      | Total (n = 160)  | Group             |                             | P                |
|-------------------------------|------------------|-------------------|-----------------------------|------------------|
|                               |                  | Controls (n = 80) | sanitation workers (n = 80) |                  |
| Age, year                     | 52.21 $\pm$ 4.86 | 51.91 $\pm$ 4.29  | 52.50 $\pm$ 5.38            | 0.447            |
| Sleep duration, hours         | 6.71 $\pm$ 1.29  | 6.79 $\pm$ 1.08   | 6.63 $\pm$ 1.47             | 0.442            |
| BMI (kg/m <sup>2</sup> )      | 24.37 $\pm$ 2.88 | 24.74 $\pm$ 2.72  | 23.99 $\pm$ 3.00            | 0.098            |
| Smoking status*, n (%)        |                  |                   |                             | <b>0.023</b>     |
| never /occasional             | 124 (77.50)      | 56 (70.00)        | 68 (85.00)                  |                  |
| previous                      | 36 (22.50)       | 24 (30.00)        | 12 (15.00)                  |                  |
| Physical activity, n (%)      |                  |                   |                             | <b>&lt;0.001</b> |
| no                            | 50 (31.25)       | 14 (17.50)        | 36 (45.00)                  |                  |
| yes                           | 110 (68.75)      | 66 (82.50)        | 44 (55.00)                  |                  |
| Three basic meals, n (%)      |                  |                   |                             | <b>&lt;0.001</b> |
| irregularly                   | 86 (53.75)       | 57 (71.25)        | 29 (36.25)                  |                  |
| regularly                     | 74 (46.25)       | 23 (28.75)        | 51 (63.75)                  |                  |
| Educational attainment, n (%) |                  |                   |                             | <b>&lt;0.001</b> |
| < High school                 | 85 (53.12)       | 16 (20.00)        | 69 (86.25)                  |                  |
| $\geq$ High school            | 75 (46.88)       | 64 (80.00)        | 11 (13.75)                  |                  |
| Marital status, n (%)         |                  |                   |                             | 0.677            |
| Married                       | 154 (96.25)      | 76 (95.00)        | 78 (97.50)                  |                  |
| other                         | 6 (3.75)         | 4 (5.00)          | 2 (2.50)                    |                  |
| Weekly working hours          |                  |                   |                             | 0.255            |
| < 48hours                     | 99 (61.88)       | 46 (57.50)        | 53 (66.25)                  |                  |
| $\geq$ 48 hours               | 61 (38.12)       | 34 (42.50)        | 27 (33.75)                  |                  |

Abbreviations: BMI, body mass index; TL, telomere length.

\*: The study population did not include any current smokers.

Note: Bolded numbers indicate statistical significance

<https://doi.org/10.1371/journal.pone.0311736.t001>

Center of Shenzhen Prevention and Treatment Center for Occupational Diseases (SPTCOD). The health-related questionnaires included basic demographic information (age, gender, ethnicity, marital status, and educational attainment) and questionnaires about lifestyle factors (smoking status, alcohol consumption, three basic meals including breakfast, lunch, and dinner, weekly working hours and sleep duration, etc.). Before the commencement of the survey, all participants were required to provide written informed consent. The study was approved by the Ethics Committee of SPTCOD (No. LL2020-34) and by the 1975 Declaration of Helsinki and its later amendments or comparable ethical standards.

### Assessments of inflammation indicators

A total of 5.0 mL of upper limb venous blood was collected from each participant and subsequently transferred separately into two tubes: one containing a regular biochemical reagent without anticoagulant and the other containing EDTA-anticoagulant, the EDTA anti-coagulated blood samples were reused for DNA extraction after the complete blood cell count test. We stored the blood samples at  $-80^{\circ}\text{C}$  for later DNA extraction and TL measurement after the samples were examined for blood cells and inflammation indicators immediately after collection. The complete blood cell count test was analyzed using Auto Hematology Analyzer (Instrument model: BC-6800Plus manufactured by Shenzhen Mindray Biomedical Electronics Co., Ltd.). Serum albumin concentration was analyzed using Clinical Chemistry analyzers (Instrument model: AU5800 manufactured by Beckman Coulter Co., Ltd.). The IRIs was calculated based on the results of the complete blood cell count (CBC) test. SII (platelet count  $\times$  neutrophil count/lymphocyte count). Other inflammation-related indices included PLR (platelet count /lymphocyte count), NLR (neutrophil count /lymphocyte count), lymphocyte count (LYM,  $\times 10^{-9}/\text{L}$ ), and serum albumin concentration (ALB, g/L).

### DNA extraction and TL measurement

The extraction process employs a distinctive buffer system that utilizes silicon-based magnetic beads to specifically adsorb and release nucleic acids, thereby facilitating the separation and purification of nucleic acids. Once the cells had reached approximately 80% confluence, the medium was removed, and the cells were washed twice with phosphate-buffered saline (PBS) solution. 1 mL of DNAzol (Invitrogen) solution was added per  $2 \times 10^6$  cells, and after the cells were completely lysed, they were transferred to a centrifuge tube, 0.5 mL of anhydrous ethanol was added, and the tube was gently inverted to mix. The precipitate was washed twice with 75% ethanol and the appropriate amount of TE solution (1 mmol/L EDTA, 10 mmol/L Tris, pH 8.0) was added to dissolve the precipitate. The DNA concentration and purity were determined, the measurement was repeated 3 times for each sample to take the average value, and it was ensured that the optical density  $D_{260}/D_{280}$  ratio of all samples was between 1.8 and 2.0 and stored at  $-20^{\circ}\text{C}$  for spare parts.

Telomere length measurement: The sample DNA was diluted to 17.5 mg/L,  $95^{\circ}\text{C}$  for 10 min, immediately ice bathed for 10 minutes, briefly centrifuged at  $730 \times g$ , and stored at  $4^{\circ}\text{C}$  protected from light. Each primer (Invitrogen) was diluted to the appropriate concentration ( $10 \times$ ) with TE (pH 8.0). Telomeric primer sequences: tel1 GGTTTTGGAGGGTGGG-GTG AGGGTGAGGGTGAGGGTGAGGT,  $2.7 \mu\text{mol/L}$ ; tel2 TCCCGACTATCCCTATCCCTATCCCTATCCCTATCCCTATCCCTA,  $9 \mu\text{mol/L}$ . The single-copy reference gene ( $\beta$ -globin) primer: HBG1 GCTTCTGACACAACCTTGTTCACTAGC,  $4 \mu\text{mol/L}$ ; HBG2 CACCAAC-TTCATCCACGTTTAC,  $4 \mu\text{mol/L}$ . Single wells were used with a  $20 \mu\text{L}$  reaction system containing 35 ng of sample genomic DNA, with three replicate wells. All samples were subjected to two sets of amplification: one is telomere fragment (T) amplification, and the other is reference gene (S) amplification.

Negative control was set in each group. The reaction was started at 95°C for 10 min. After that, the telomeric repeat fragments were amplified at 95°C, 15s, 54°C, 2 min for 22 cycles, and the single-copy gene was amplified at 95°C, 15 S, 58°C, 1 min for 30 cycles. All reactions were performed using an ABI 7300 Sequence detection system (Applied Biosystems, Foster City CA, USA). Two sets of  $C_t$  are obtained for each sample, and the difference between the two values with the same hole location is  $\Delta C_t$ . The T/S ratio is calculated as  $T/S \text{ ratio} = 2^{-\Delta C_t}$ . Each sample was tested three times, and the results were averaged. The mean value of the T/S ratio for each sample is proportional to its telomere length and is referred to as the mean T/S ratio. For comparison, in an experiment, one sample is selected as a reference and its value is set to 1, and the measurements of the other samples are adjusted accordingly, resulting in the relative T/S ratio.

**Covariates assessment.** The assessed covariates included age (year), body mass index (BMI, kg/m<sup>2</sup>), sleep duration (hour), smoking status (never or occasional/previous), physical activity (no/yes), three basic meals (regularly / irregularly), educational attainment (<High school /  $\geq$ High school), marital status (married / others), weekly working hours (<48 hours /  $\geq$ 48 hours). It is worth noting that the participants in this study were all ex-smokers or never smokers. None were current smokers.

## Statistical analysis

The assessment was conducted to compare baseline conditions, and differences in inflammation-related markers and TL, and to investigate the relationship between inflammation-related markers and TL between sanitation workers and controls. Categorical variables were identified as percentages [n (%)]. If the variables in question displayed a normal distribution, they were expressed as a mean and standard deviation (mean  $\pm$  SD). For variables exhibiting non-normal distributions, the median and quartiles (M  $\pm$  IQR) were employed for expression. To ascertain the baseline characteristics of the two groups, student t-tests were employed in the case of continuous variables, while chi-square tests were used concerning categorical variables. Multivariate linear regression was used to calculate regression coefficients ( $\beta$ ) and 95% confidence intervals (CIs) of IRIs on TL for the sanitation worker and control groups, respectively. Model 1 accounted for age and BMI. Model 2 further accounted for additional variables, including sleep duration, smoking status, physical activity, three basic meals, educational attainment, marital status, and weekly working hours. Furthermore, a restricted triple spline was employed to investigate the dose-response relationship between IRIs and TL in the Sanitation workers group and control groups. Statistical analyses were performed using R 4.3.1 [29], and a significance level of <0.05 (two-tailed) was considered statistically significant.

## Results

Table 1 presents the baseline for the Sanitation Workers and the controls. In comparison to the controls, the sanitation workers exhibited lower levels of education, more irregular meal patterns, and lower rates of regular exercise. The two groups did not differ statistically regarding age, BMI, sleep duration, or marital status. Moreover, the sanitation workers exhibited shorter TL, lower LYM, and ALB, but higher SII, PLR, and NLR (Fig 1).

The one-factor linear regression analysis did not demonstrate statistically significant correlations between telomere length and factors such as age, BMI, sleep duration, smoking status, physical activity, three basic meals, educational attainment, marital status, weekly working hours, ALB, SII, PLR, and NLR in either the sanitation workers or the control group. However, a negative relation was observed between LYM and TL in the group of sanitation workers. ( $\beta$  = -0.31, 95% CI: -0.57, -0.05) (Table 2).

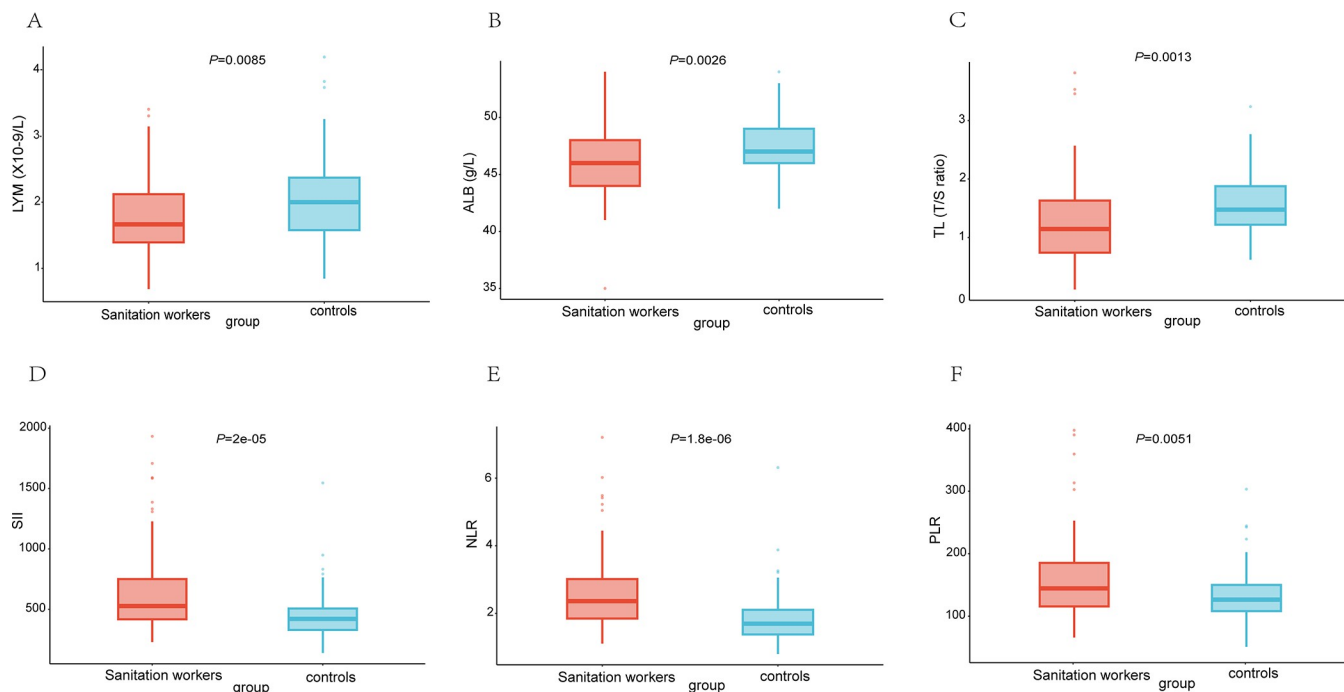

**Fig 1. Comparison of inflammation-related markers and telomere length between sanitation worker and control groups.** Abbreviations: ALB, serum albumin concentration; LYM, lymphocyte count; SII, Systemic Inflammation Index; PLR, Platelet to lymphocyte ratio; NLR, Neutrophil to lymphocyte ratio. (A): The level of LYM was found to be lower in the sanitation worker group compared to the control group. (B): The mean ALB was found to be lower in the sanitation worker group compared to the control group. (C): Compared to the control, the telomere length was lower in the sanitation worker group. (D): The SII was found to be significantly higher in the sanitation worker group than in the control group. (E): The NLR was found to be significantly higher in the sanitation worker group than in the control group. (F): The PLR was found to be significantly higher in the sanitation worker group than in the control group.

<https://doi.org/10.1371/journal.pone.0311736.g001>

Table 3 provides the findings of the multivariate linear regression model. In Model 1, after accounting for age and BMI, there was a negative correlation between LYM and TL in the sanitation workers ( $\beta = -0.38$ , 95% CI: -0.66, -0.10), while the correlation was not statistically significant in the controls. Further adjustment for other potential confounding variables in Model 2 revealed that LYM remained correlated with TL in sanitation workers ( $\beta = -0.36$ , 95% CI: -0.65, -0.07). However, the correlations of ALB, SII, PLR, and NLR with TL were not significant in either group.

A restricted cubic spline was employed to analyze the dose-response relationship between IRIs and TL. After adjusting for potential confounding variables, we observed a non-linear relationship between ALB and TL in sanitation workers ( $P$  for nonlinearity = 0.004) (Fig 2).

## Discussion

We found that novel inflammatory markers (SII, PLR, and NLR) exhibited significantly elevated levels in the sanitation workers in comparison to the controls. The LYM, ALB, and TL levels were lower in the sanitation workers compared to the controls. Furthermore, a negative relation was observed between LYM and TL in the sanitation workers, whereas no such correlation was evident in the controls. What is more, a non-linear relationship was identified between ALB and TL in sanitation workers.

The findings of our study indicate that a reduction in LYM is positively related to TL shortening in sanitation workers. Our findings are supported by a recent study in which TL was associated with lymphocyte count in elderly patients with coronavirus disease in 2019 [30]. Additionally, several studies have demonstrated a correlation between the proliferative



Table 2. Linear regression with one variable analysis between various factors on telomere length in sanitation workers and control groups.

| Variables                  | Sanitation workers          |              | Controls            |              |
|----------------------------|-----------------------------|--------------|---------------------|--------------|
|                            | $\beta$ (95%CI)             | P            | $\beta$ (95%CI)     | P            |
| Age (year)                 | -0.00 (-0.04, 0.03)         | 0.768        | -0.02 (-0.04, 0.01) | <b>0.235</b> |
| BMI (kg/m <sup>2</sup> )   | 0.01 (-0.05, 0.06)          | 0.756        | -0.01 (-0.05, 0.04) | 0.765        |
| Sleep duration (hours)     | -0.08 (-0.19, 0.03)         | 0.183        | 0.02 (-0.09, 0.13)  | 0.725        |
| LYM ( $\times 10^{-9}$ /L) | <b>-0.31 (-0.57, -0.05)</b> | <b>0.024</b> | -0.06 (-0.24, 0.12) | 0.531        |
| ALB (g/L)                  | 0.02 (-0.04, 0.07)          | 0.542        | 0.01 (-0.04, 0.06)  | 0.636        |
| SII                        | 0.00 (-0.00, 0.00)          | 0.734        | 0.00 (-0.00, 0.00)  | 0.332        |
| PLR                        | 0.00 (-0.00, 0.00)          | 0.505        | 0.00 (-0.00, 0.00)  | 0.299        |
| NLR                        | 0.09 (-0.05, 0.23)          | 0.204        | 0.08 (-0.07, 0.23)  | 0.324        |
| Smoking status             |                             |              |                     |              |
| never /occasional          | 0.00 (Reference)            |              | 0.00 (Reference)    |              |
| previous                   | -0.21 (-0.67, 0.25)         | 0.37         | 0.17 (-0.08, 0.42)  | 0.181        |
| Physical activity          |                             |              |                     |              |
| no                         | 0.00 (Reference)            |              | 0.00 (Reference)    |              |
| yes                        | 0.03 (-0.30, 0.36)          | 0.867        | -0.02 (-0.32, 0.29) | 0.909        |
| three basic meals          |                             |              |                     |              |
| irregularly                | 0.00 (Reference)            |              | 0.00 (Reference)    |              |
| regularly                  | 0.16 (-0.18, 0.50)          | 0.373        | 0.06 (-0.20, 0.31)  | 0.665        |
| Educational attainment     |                             |              |                     |              |
| < High school              | 0.00 (Reference)            |              | 0.00 (Reference)    |              |
| $\geq$ High school         | 0.03 (-0.44, 0.51)          | 0.893        | -0.14 (-0.43, 0.15) | 0.335        |
| Marital status             |                             |              |                     |              |
| married                    | 0.00 (Reference)            |              | 0.00 (Reference)    |              |
| others                     | -0.36 (-1.41, 0.69)         | 0.499        | -0.22 (-0.75, 0.31) | 0.418        |
| Weekly working hours       |                             |              |                     |              |
| < 48hours                  | 0.00 (Reference)            |              | 0.00 (Reference)    |              |
| $\geq$ 48 hours            | 0.06 (-0.29, 0.41)          | 0.729        | 0.16 (-0.07, 0.40)  | 0.169        |

Abbreviations: BMI, body mass index; ALB, serum albumin concentration; LYM, lymphocyte count; SII, Systemic Inflammation Index; PLR, Platelet to lymphocyte ratio; NLR, Neutrophil to lymphocyte ratio.

Note: Bolded numbers indicate statistical significance

<https://doi.org/10.1371/journal.pone.0311736.t002>

capacity of T lymphocytes and TL [31, 32]. Furthermore, we observed that novel inflammatory markers (SII, NLR, and PLR) were elevated in sanitation workers compared to the control population (general population). A study by Colella *et al.* demonstrated that patients with sickle cell disease exhibited shorter telomeres, which may be directly related to inflammatory markers [33]. It can be reasonably concluded from previous research findings that inflammation is an important factor contributing to telomere shortening [20]. Indeed, low LYM is a manifestation of inflammation [22]. Furthermore, a significant number of investigations have demonstrated a correlation between LYM and age-related diseases [23–25, 34]. Our results provide further evidence that inflammation could be an important mechanism for telomere shortening.

We found that ALB was lower in the sanitation workers compared with the controls. Low ALB concentration was reported to be associated with inflammation [35, 36]. This may be related to the low economic and social status of the sanitation workers and low-quality lifestyle. *etc.* In addition, several studies have reported that low ALB levels are linked to a greater risk of mortality over an extended period among elderly individuals [37–39]. Decreased ALB is

**Table 3. Multivariate linear regression analysis of inflammatory markers and telomere length in sanitation worker and control groups.**

|                            | Sanitation workers          |                             | Controls                    |                             |
|----------------------------|-----------------------------|-----------------------------|-----------------------------|-----------------------------|
|                            | Model 1<br>$\beta$ (95% CI) | Model 2<br>$\beta$ (95% CI) | Model 1<br>$\beta$ (95% CI) | Model 2<br>$\beta$ (95% CI) |
| LYM ( $\times 10^{-9}/L$ ) | <b>-0.38 (-0.66, -0.10)</b> | <b>-0.36 (-0.65, -0.07)</b> | -0.05 (-0.24, 0.13)         | -0.06 (-0.26, 0.14)         |
| <i>P</i>                   | <b>0.010</b>                | <b>0.019</b>                | 0.795                       | 0.528                       |
| ALB (g/L)                  | 0.02 (-0.04, 0.08)          | 0.03 (-0.03, 0.09)          | 0.01 (-0.04, 0.06)          | 0.01 (-0.04, 0.06)          |
| <i>P</i>                   | 0.551                       | 0.388                       | 0.568                       | 0.728                       |
| SII                        | 0.00 (-0.00, 0.00)          | 0.00 (-0.00, 0.00)          | 0.00 (-0.00, 0.00)          | 0.00 (-0.00, 0.00)          |
| <i>P</i>                   | 0.670                       | 0.597                       | 0.282                       | 0.183                       |
| PLR                        | 0.00 (-0.00, 0.00)          | 0.00 (-0.00, 0.00)          | 0.00 (-0.00, 0.00)          | 0.00 (-0.00, 0.01)          |
| <i>P</i>                   | 0.406                       | 0.311                       | 0.317                       | 0.146                       |
| NLR                        | 0.11 (-0.04, 0.25)          | 0.10 (-0.05, 0.25)          | 0.09 (-0.06, 0.24)          | 0.09 (-0.07, 0.25)          |
| <i>P</i>                   | 0.157                       | 0.210                       | 0.258                       | 0.277                       |

Model 1: Adjustment for age (year), BMI ( $\text{kg}/\text{m}^2$ ).

Model 2: Adjustment for age (year), BMI ( $\text{kg}/\text{m}^2$ ), sleep duration (hour), smoking status (never or occasional /previous), physical activity(no/yes), three basic meals(regularly/irregularly), educational attainment (< high school/  $\geq$  high school), marital status (married/ others), weekly working hours (<48hours /  $\geq$ 48 hours).

Note: Bolded numbers indicate statistical significance

<https://doi.org/10.1371/journal.pone.0311736.t003>

strongly associated with aging, reflecting conditions of inflammation, frailty, and a variety of pathologies, including cancer, deforming arthritis, and hepatic malfunction [26, 27]. Marjolein *et al.* indicated that low ALB may be associated with an increased risk of developing sarcopenia [28]. These studies support our findings that lower ALB in sanitation workers is associated with shortened TL.

## Strengths and limitations

In the authors' knowledge, this represents the inaugural study to investigate the correlation between IRIs and TL in sanitation workers. Nevertheless, the assessment of the findings is constrained by the following factors. First, the cross-sectional design precludes the drawing of causal inferences. Although we adjusted for several important confounders, unidentified or residual confounders may still cause bias. For example, we did not measure factors such as the level of dust exposure of sanitation workers and the economic and social status of the study participants. Further cohort or intervention studies are also needed to confirm our findings.

## Conclusion

The results of the study demonstrated a correlation between LYM and ALB with shortened TL in sanitation workers, and the novel inflammatory markers (SII, PLR, and NLR) were higher in sanitation workers than the controls. This study provides new evidence for the effect of elevated inflammation on accelerated aging in Chinese sanitation workers. We recommend that local governments and relevant authorities take steps to reinforce the protection of occupational health and labor rights for sanitation workers. This would serve to enhance their occupational status and health.



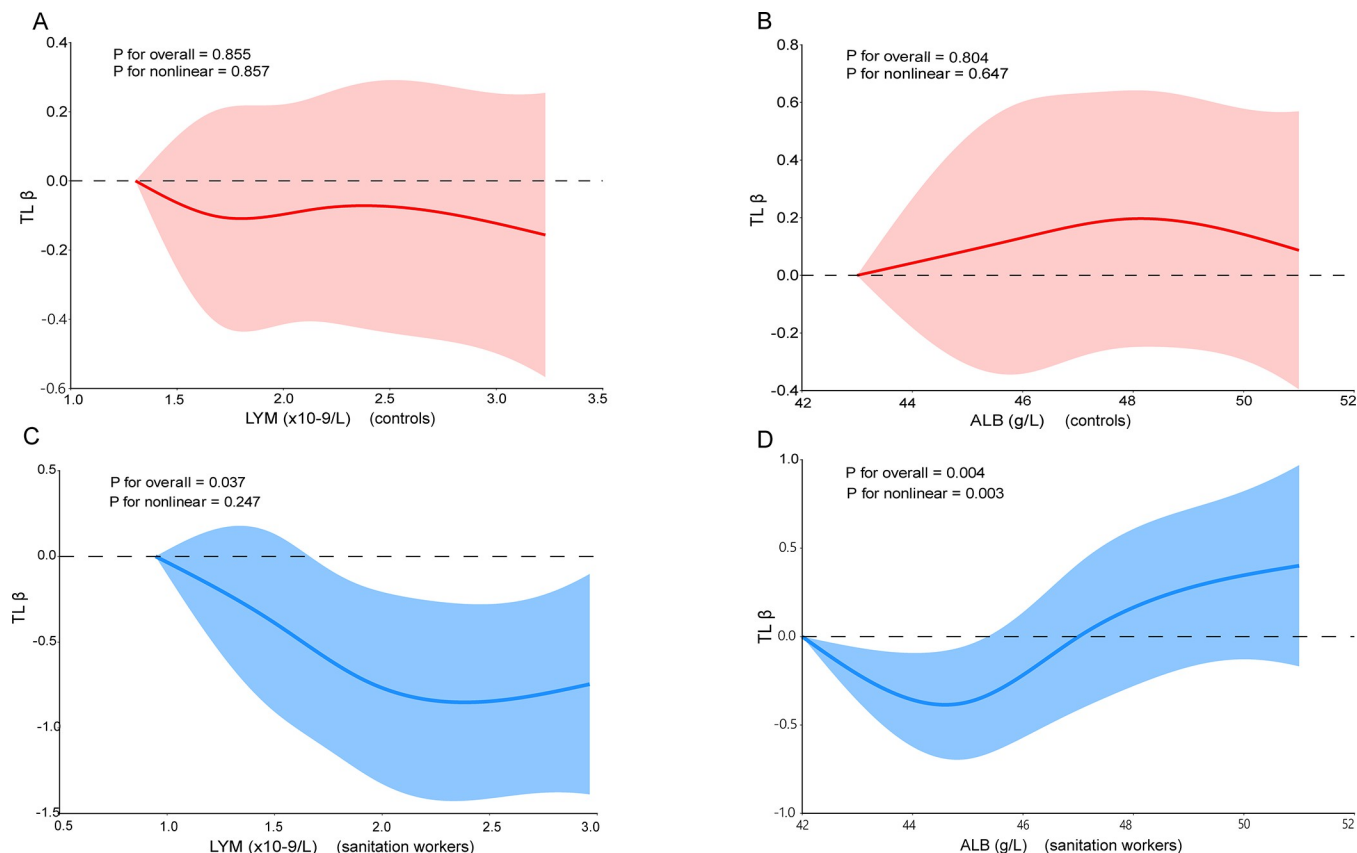

**Fig 2. The relationship between serum albumin concentration, lymphocyte count, and telomere length in sanitation worker and control groups was fitted using restricted cubic spline curves.** Adjustment for age(year), BMI ( $\text{kg}/\text{m}^2$ ), sleep duration (hour), smoking status (never or occasional /previous), physical activity (no/yes), three basic meals (regularly/irregularly), educational attainment ( $<$  high school/ $\geq$ high school), marital status (married/ others), weekly working hours ( $<$ 48hours/ $\geq$ 48 hours). (A): Non-linear relationship between LYM and TL in the control group. (B): Non-linear relationship between ALB and TL in the control group. (C): Non-linear relationship between LYM and TL in the sanitation worker group. (D): Non-linear relationship between ALB and TL in the sanitation worker group.

<https://doi.org/10.1371/journal.pone.0311736.g002>

## Supporting information

### S1 Table. Sanitation worker data.

(XLSX)

### S2 Table. Control group data.

(XLSX)

## Acknowledgments

The authors would like to thank colleagues from the Physical Examination Center and Medical Laboratory, Shenzhen Prevention and Treatment Center for Occupational Diseases, who had been working so hard to help accomplish this work.

## Author Contributions

**Data curation:** Xingxu Song.

**Formal analysis:** Xingxu Song, Dianpeng Wang.

**Investigation:** Dafeng Lin, Shaofan Weng, Wei Zhou, Naixing Zhang.

**Methodology:** Dafeng Lin.

**Supervision:** Shuyi Qiu, Aipin Xiao.

**Writing – original draft:** Xingxu Song, Dafeng Lin, Dianpeng Wang.

**Writing – review & editing:** Xingxu Song, Dafeng Lin, Dianpeng Wang.

## References

1. Health, safety and dignity of sanitation workers [<https://www.who.int/publications/m/item/health-safety-and-dignity-of-sanitation-workers>]
2. Nayak S, Shenoi S, Kaur G, Bisen N, Purkayastha A, Chalissery J: Dermatologic evaluation of street sanitation workers. *Indian J Dermatol* 2013, 58(3):246. <https://doi.org/10.4103/0019-5154.110888> PMID: 23723520
3. Werna FCaE: The health of workers in selected sectors of the urban economy: Challenges and perspectives. 2013.
4. Fahim AE, El-Prince M: Passive smoking, pulmonary function and bronchial hyper-responsiveness among indoor sanitary workers. *Ind Health* 2012, 50(6):516–520. <https://doi.org/10.2486/indhealth.2012-0003> PMID: 23047075
5. Chandra K, Arora VK: Tuberculosis and other chronic morbidity profile of sewage workers of Delhi. *Indian J Tuberc* 2019, 66(1):144–149. <https://doi.org/10.1016/j.ijtb.2018.09.003> PMID: 30797273
6. Dzaman K, Wojdas A, Rapiejko P, Jurkiewicz D: Taste and smell perception among sewage treatment and landfill workers. *Int J Occup Med Environ Health* 2009, 22(3):227–234. <https://doi.org/10.2478/v10001-009-0025-4> PMID: 19887366
7. Rangamani S, Obalesha KB, Gaitonde R: Health issues of sanitation workers in a town in Karnataka: Findings from a lay health-monitoring study. *Natl Med J India* 2015, 28(2):70–73. PMID: 26612148
8. Friedrich M, Cermak T, Heiller I: Spinal troubles in sewage workers: epidemiological data and work disability due to low back pain. *Int Arch Occup Environ Health* 2000, 73(4):245–254. <https://doi.org/10.1007/s004200050424> PMID: 10877030
9. Taha MM, Mahdy-Abdallah H, Shahy EM, Ibrahim KS, Elserougy S: Impact of occupational cadmium exposure on bone in sewage workers. *Int J Occup Environ Health* 2018, 24(3–4):101–108. <https://doi.org/10.1080/10773525.2018.1518745> PMID: 30222069
10. Heldal KK, Austigard Å D, Svendsen KH, Einarsdottir E, Goffeng LO, Sikkeland LI, et al.: Endotoxin and Hydrogen Sulphide Exposure and Effects on the Airways Among Waste Water Workers in Sewage Treatment Plants and Sewer Net System. *Ann Work Expo Health* 2019, 63(4):437–447. <https://doi.org/10.1093/annweh/wxz020> PMID: 30938763
11. Rieger MA, Liebers V, Nübling M, Brünig T, Brendel B, Hoffmeyer F, et al.: Adaptation to Occupational Exposure to Moderate Endotoxin Concentrations: A Study in Sewage Treatment Plants in Germany. *Adv Exp Med Biol* 2018, 1116:89–109. [https://doi.org/10.1007/5584\\_2018\\_261](https://doi.org/10.1007/5584_2018_261) PMID: 30284691
12. Thorn J, Beijer L, Rylander R: Work related symptoms among sewage workers: a nationwide survey in Sweden. *Occup Environ Med* 2002, 59(8):562–566. <https://doi.org/10.1136/oem.59.8.562> PMID: 12151615
13. Oza HH, Lee MG, Boisson S, Pega F, Medlicott K, Clasen T: Occupational health outcomes among sanitation workers: A systematic review and meta-analysis. *Int J Hyg Environ Health* 2022, 240:113907. <https://doi.org/10.1016/j.ijheh.2021.113907> PMID: 34942466
14. Xu M, Pirtskhalava T, Farr JN, Weigand BM, Palmer AK, Weivoda MM, et al.: Senolytics improve physical function and increase lifespan in old age. *Nat Med* 2018, 24(8):1246–1256. <https://doi.org/10.1038/s41591-018-0092-9> PMID: 29988130
15. Babizhayev MA, Savel'yeva EL, Moskvina SN, Yegorov YE: Telomere length is a biomarker of cumulative oxidative stress, biologic age, and an independent predictor of survival and therapeutic treatment requirement associated with smoking behavior. *Am J Ther* 2011, 18(6):e209–226. <https://doi.org/10.1097/MJT.0b013e3181cf8ebb> PMID: 20228673
16. Ennour-Idrissi K, Maunsell E, Diorio C: Telomere Length and Breast Cancer Prognosis: A Systematic Review. *Cancer Epidemiol Biomarkers Prev* 2017, 26(1):3–10. <https://doi.org/10.1158/1055-9965.EPI-16-0343> PMID: 27677729

17. Haycock PC, Heydon EE, Kaptoge S, Butterworth AS, Thompson A, Willeit P: Leucocyte telomere length and risk of cardiovascular disease: systematic review and meta-analysis. *Bmj* 2014, 349:g4227. <https://doi.org/10.1136/bmj.g4227> PMID: 25006006
18. Zhao J, Zhu Y, Lin J, Matsuguchi T, Blackburn E, Zhang Y, et al.: Short leukocyte telomere length predicts risk of diabetes in american indians: the strong heart family study. *Diabetes* 2014, 63(1):354–362. <https://doi.org/10.2337/db13-0744> PMID: 23949319
19. Wang Q, Zhan Y, Pedersen NL, Fang F, Hägg S: Telomere Length and All-Cause Mortality: A Meta-analysis. *Ageing Res Rev* 2018, 48:11–20. <https://doi.org/10.1016/j.arr.2018.09.002> PMID: 30254001
20. Aviv A: Telomeres and human aging: facts and fids. *Sci Aging Knowledge Environ* 2004, 2004(51):pe43. <https://doi.org/10.1126/sageke.2004.51.pe43> PMID: 15618136
21. Ning P, Yang F, Kang J, Yang J, Zhang J, Tang Y, et al.: Predictive value of novel inflammatory markers platelet-to-lymphocyte ratio, neutrophil-to-lymphocyte ratio, and monocyte-to-lymphocyte ratio in arterial stiffness in patients with diabetes: A propensity score-matched analysis. *Front Endocrinol (Lausanne)* 2022, 13:1039700. <https://doi.org/10.3389/fendo.2022.1039700> PMID: 36619559
22. Ulich TR, del Castillo J, Ni RX, Bikhazi N, Calvin L: Mechanisms of tumor necrosis factor alpha-induced lymphopenia, neutropenia, and biphasic neutrophilia: a study of lymphocyte recirculation and hematologic interactions of TNF alpha with endogenous mediators of leukocyte trafficking. *J Leukoc Biol* 1989, 45(2):155–167. <https://doi.org/10.1002/jlb.45.2.155> PMID: 2492593
23. Fernández-Garrido J, Navarro-Martínez R, Buigues-González C, Martínez-Martínez M, Ruiz-Ros V, Cauli O: The value of neutrophil and lymphocyte count in frail older women. *Exp Gerontol* 2014, 54:35–41. <https://doi.org/10.1016/j.exger.2013.11.019> PMID: 24316038
24. Gupta S, Agrawal A, Agrawal S, Su H, Gollapudi S: A paradox of immunodeficiency and inflammation in human aging: lessons learned from apoptosis. *Immun Ageing* 2006, 3:5. <https://doi.org/10.1186/1742-4933-3-5> PMID: 16712718
25. Levy WC, Mozaffarian D, Linker DT, Sutradhar SC, Anker SD, Cropp AB, et al.: The Seattle Heart Failure Model: prediction of survival in heart failure. *Circulation* 2006, 113(11):1424–1433. <https://doi.org/10.1161/CIRCULATIONAHA.105.584102> PMID: 16534009
26. Don BR, Kaysen G: Serum albumin: relationship to inflammation and nutrition. *Semin Dial* 2004, 17(6):432–437. <https://doi.org/10.1111/j.0894-0959.2004.17603.x> PMID: 15660573
27. Fanali G, di Masi A, Trezza V, Marino M, Fasano M, Ascenzi P: Human serum albumin: from bench to bedside. *Mol Aspects Med* 2012, 33(3):209–290. <https://doi.org/10.1016/j.mam.2011.12.002> PMID: 22230555
28. Visser M, Kritchevsky SB, Newman AB, Goodpaster BH, Tylavsky FA, Nevitt MC, et al.: Lower serum albumin concentration and change in muscle mass: the Health, Aging and Body Composition Study. *Am J Clin Nutr* 2005, 82(3):531–537. <https://doi.org/10.1093/ajcn.82.3.531> PMID: 16155264
29. R Core Team. R: A language and environment for statistical computing. Vienna: R Foundation for Statistical Computing; 2021 [<https://www.R-project.org/>]
30. Benetos A, Lai TP, Toupance S, Labat C, Verhulst S, Gautier S, et al.: The Nexus Between Telomere Length and Lymphocyte Count in Seniors Hospitalized With COVID-19. *J Gerontol A Biol Sci Med Sci* 2021, 76(8):e97–e101. <https://doi.org/10.1093/gerona/glab026> PMID: 33528568
31. Hodes RJ, Hathcock KS, Weng NP: Telomeres in T and B cells. *Nat Rev Immunol* 2002, 2(9):699–706. <https://doi.org/10.1038/nri890> PMID: 12209138
32. Patrick M, Weng NP: Expression and regulation of telomerase in human T cell differentiation, activation, aging and diseases. *Cell Immunol* 2019, 345:103989. <https://doi.org/10.1016/j.cellimm.2019.103989> PMID: 31558266
33. Colella MP, Santana BA, Conran N, Tomazini V, Costa FF, Calado RT, et al.: Telomere length correlates with disease severity and inflammation in sickle cell disease. *Rev Bras Hematol Hemoter* 2017, 39(2):140–145. <https://doi.org/10.1016/j.bjhh.2017.02.007> PMID: 28577651
34. Major AS, Fazio S, Linton MF: B-lymphocyte deficiency increases atherosclerosis in LDL receptor-null mice. *Arterioscler Thromb Vasc Biol* 2002, 22(11):1892–1898. <https://doi.org/10.1161/01.atv.0000039169.47943.ee> PMID: 12426221
35. Naber TH, de Bree A, Schermer TR, Bakkeren J, Bär B, de Wild G, et al.: Specificity of indexes of malnutrition when applied to apparently healthy people: the effect of age. *Am J Clin Nutr* 1997, 65(6):1721–1725. <https://doi.org/10.1093/ajcn/65.6.1721> PMID: 9174466
36. Huang Y, Shinzawa H, Togashi H, Takahashi T, Kuzumaki T, Otsu K, et al.: Interleukin-6 down-regulates expressions of the aldolase B and albumin genes through a pathway involving the activation of tyrosine kinase. *Arch Biochem Biophys* 1995, 320(2):203–209. [https://doi.org/10.1016/0003-9861\(95\)90001-2](https://doi.org/10.1016/0003-9861(95)90001-2) PMID: 7625825

37. Takata Y, Ansai T, Yoshihara A, Miyazaki H: Serum albumin (SA) levels and 10-year mortality in a community-dwelling 70-year-old population. *Arch Gerontol Geriatr* 2012, 54(1):39–43. <https://doi.org/10.1016/j.archger.2011.02.018> PMID: 21458870
38. Sahyoun NR, Jacques PF, Dallal G, Russell RM: Use of albumin as a predictor of mortality in community dwelling and institutionalized elderly populations. *J Clin Epidemiol* 1996, 49(9):981–988. [https://doi.org/10.1016/0895-4356\(96\)00135-7](https://doi.org/10.1016/0895-4356(96)00135-7) PMID: 8780605
39. Corti MC, Guralnik JM, Salive ME, Sorkin JD: Serum albumin level and physical disability as predictors of mortality in older persons. *Jama* 1994, 272(13):1036–1042. PMID: 8089886
